1        **Large-scale analysis of SARS-CoV-2 spike-glycoprotein**  
2        **mutants demonstrates the need for continuous screening of**  
3        **virus isolates**

4

5        **Barbara Schrörs<sup>1</sup>, Ranganath Gudimella<sup>¶</sup>, Thomas Bukur<sup>¶</sup>, Thomas Rösler<sup>1</sup>, Martin Löwer<sup>1\*</sup>**  
6        **& Ugur Sahin<sup>1,2\*</sup>**

7        <sup>1</sup> TRON gGmbH - Translationale Onkologie an der Universitätsmedizin der Johannes Gutenberg-  
8        Universität Mainz gemeinnützige GmbH, Mainz, Germany

9        <sup>2</sup> BioNTech SE, Mainz, Germany

10       **\* Corresponding authors:**

11       martin.loewer@tron-mainz.de (ML)

12       sahin@uni-mainz.de (US)

13       <sup>¶</sup> These authors contributed equally to this work.

14

15

## 16 **Abstract**

17 Due to the widespread of the COVID-19 pandemic, the SARS-CoV-2 genome is evolving in diverse  
18 human populations. Several studies already reported different strains and an increase in the mutation  
19 rate. Particularly, mutations in SARS-CoV-2 spike-glycoprotein are of great interest as it mediates  
20 infection in human and recently approved mRNA vaccines are designed to induce immune responses  
21 against it.

22 We analyzed 146,917 SARS-CoV-2 genome assemblies and 2,393 NGS datasets from GISAID, NCBI  
23 Virus and NCBI SRA archives focusing on non-synonymous mutations in the spike protein.

24 Only around 13.8% of the samples contained the wild-type spike protein with no variation from the  
25 reference. Among the spike protein mutants, we confirmed a low mutation rate exhibiting less than 10  
26 non-synonymous mutations in 99.98% of the analyzed sequences, but the mean and median number of  
27 spike protein mutations per sample increased over time. 2,592 distinct variants were found in total. The  
28 majority of the observed variants were recurrent, but only nine and 23 recurrent variants were found in  
29 at least 0.5% of the mutant genome assemblies and NGS samples, respectively. Further, we found high-  
30 confidence subclonal variants in about 15.1% of the NGS data sets with mutant spike protein, which  
31 might indicate co-infection with various SARS-CoV-2 strains and/or intra-host evolution. Lastly, some  
32 variants might have an effect on antibody binding or T-cell recognition.

33 These findings demonstrate the increasing importance of monitoring SARS-CoV-2 sequences for an  
34 early detection of variants that require adaptations in preventive and therapeutic strategies.

35

## 36 **Introduction**

37 Since the first report of the severe acute respiratory syndrome coronavirus-2 (SARS-CoV-2) outbreak  
38 (1, 2), it has transformed into a global pandemic infecting and threatening death for millions of people  
39 all over the globe. By January 20, 2021, the World Health Organization (WHO) reported 94,124,612  
40 confirmed cases and 2,034,527 deaths caused by the SARS-CoV-2 outbreak (3). On verge of the  
41 approval of SARS-CoV-2 vaccines which are designed to invoke immune responses against the spike-  
42 glycoprotein (spike protein), it becomes necessary to track the mutations in spike protein and study their  
43 relevance for current and upcoming vaccines. Also the recently approved neutralizing antibody  
44 bamlanivimab targets the spike protein of SARS-CoV-2 (4).

45 Subunits of the spike protein are valuable targets for vaccine design as the protein is responsible for  
46 viral binding and entry to host cells (5, 6). The spike protein consists of the N-terminal S1 and the C-  
47 terminal S2 subunits; the receptor-binding domain (RBD) in the S1 subunit binds to a receptor on the  
48 host cell surface and the S2 subunit fuses viral and host membranes (7). The receptor binding domain  
49 (RBD) of the SARS-CoV-2 spike protein recognizes human angiotensin-converting enzyme 2 (ACE2)  
50 as its entry receptor, similar to SARS-CoV (8). Interacting residues of the SARS-CoV-2 RBD with  
51 human ACE2 are highly conserved or share similar side chain properties with the SARS-CoV RBD (9).  
52 In addition, the SARS-CoV-2 RBD shows significantly higher binding affinity to ACE2 receptor  
53 compared to the SARS-CoV RBD. In order to repress the infection, blocking the RBD binding was  
54 effective in ACE2-expressing cells (5). Among the interacting sites in the SARS-CoV-2 RBD,  
55 particularly the amino acid residues L455, F486, Q493, S494, N501, and Y505 provide critical  
56 interactions with human ACE2 (10). These interacting residues vary due to natural selection in SARS-  
57 CoV-2 and other related coronaviruses (11). Similarly, worldwide SARS-CoV-2 genomic data shows  
58 ten RBD mutations which were caused due to natural selection by circulating among the human  
59 population (12). RBD mutations particularly at N501 may enhance the binding affinity between SARS-  
60 CoV-2 and human ACE2 significantly, improving viral infectivity and pathogenicity (10).

61 It is reported that continuous evolution of SARS-CoV-2 among the global population results into six  
62 major subtypes which involve the recurrent D614G mutation of the spike protein (13). Further, spread

63 of such recurrent mutations within sub-populations might affect the severity of disease emergence and  
64 change the trajectory of the pandemic. Studies also report high intra-host diversity caused by low  
65 frequency subclonal mutations within a specific cohort (14). It is evident that changes in the SARS-  
66 CoV-2 genome over time might show new mutations which might influence the development efforts of  
67 of interventional strategies. The variability of epitopes of the RBD might hamper the development and  
68 use of neutralizing antibodies for cross-protective activities against mutant strains (15). Mutational  
69 variants of the spike protein might as well lead to escape variants with respect to pre-existing cross-  
70 reactive CD4+ T cell responses (16) or long-term protection from re-infection through T cell memory.  
71 Hence, there is a necessity of constant monitoring of the rapidly changing mutation rates in the spike  
72 protein in SARS-CoV-2, which could have significant impact on virus infection, transmissibility and  
73 pathogenicity in the current pandemic.

74 In this study, we gathered 147,413 genomic assemblies and 2,393 NGS sequencing datasets to detect  
75 non-synonymous spike protein mutations and infer their frequency within a given sample and the effect  
76 on potential antibody binding sites and known T cell epitopes.

77

## 78 **Methods**

### 79 **SARS-CoV-2 assemblies**

80 SARS-CoV-2 assemblies from human hosts were downloaded on October 2<sup>nd</sup>, 2020 from US National  
81 Center for Biotechnology Information (NCBI) Virus (protein sequences; 17) and on October 2<sup>nd</sup>, 2020  
82 from GISAID (nucleotide sequences; 18). Pairwise alignments to the reference surface glycoprotein  
83 (NC\_045512.2\_cds\_YP\_009724390.1\_3) were performed to extract the S gene sequences from GISAID  
84 samples using the R package Biostrings (version 2.52.0). Extracted sequences were translated with  
85 option `if.fuzzy.codon = "solve"`. Amino acid sequences of less than 100 length (440 samples) or  
86 premature stop codons (53 samples) were excluded from further analyses. Non-synonymous variants  
87 were determined by pairwise alignment (Biostrings, version 2.52.0) of the protein sequences to the  
88 translated reference sequence.

89 For three sequences obtained from NCBI Virus (accession IDs: QOE35701, QIQ50182, and QIQ50192),  
90 corresponding NGS data was available at the NCBI Sequence Read Archive (SRA, see section “NGS  
91 data processing”). Variant calling in the spike protein was in concordance between the assembly and the  
92 NGS data. Therefore, only the NGS data was used for further analysis.

## 93 **NGS data processing**

94 All available NGS data for SARS-CoV-2 was downloaded on October 14<sup>th</sup>, 2020 from the NCBI SRA  
95 (<https://www.ncbi.nlm.nih.gov/genbank/sars-cov-2-seqs/>; 19) and filtered for whole genome fastq data  
96 from Illumina instruments with a human sample background. Data were aligned to the reference  
97 MN908947.3 (20).

98 Short-read whole genome sequencing data were aligned with bwa (version 0.7.17) mem (21). Output  
99 files in SAM format were sorted and converted to their binary form (BAM) using SAMtools (version  
100 0.1.16) (22). Variants were retrieved from the alignment files using BCFtools (version 1.9) mpileup  
101 (<http://samtools.github.io/bcftools/>) with the options to recalculate per-base alignment quality on the fly,  
102 disabling the maximum per-file depth, and retention of anomalous read pairs. Variants in gene gp02 (i.e.  
103 S gene) were annotated using SNPeff (version 4.3t) “ann” (23).

## 104 **Filtering subclonal variants**

105 NGS variants were filtered with at least 30 reads coverage and a fraction of supporting reads of at least  
106 0.1 and less than 0.95 to identify high-confidence sub-clonal mutations (24).

## 107 **Calculation of solvent-accessible residues and corresponding** 108 **solvent-accessible surface areas**

109 Solvent-accessible residues of the spike protein were calculated using the rolling ball algorithm of the  
110 Swiss PDB Viewer (version 4.1.0; 25) with a parameter setting of  $\geq 30\%$  accessible surface.

111 Solvent-accessible surface area (SASA) was calculated with tools from PyRosetta (version PyRosetta-  
112 4 2019) with default settings on reference pdb-structure “6vxx” for the spike protein (from PDB-Protein-  
113 Databank). SASA was calculated for every residue (in triplicates by the trimeric structure of the spike

114 protein). The mutated structures were generated by introducing single mutations into the reference  
115 structure by tools from PyRosetta, too. This included merely a repacking of side-chains locally around  
116 the mutation side (with radius 3 Å), leaving the backbone unaltered.

## 117 **Published SARS-CoV-2 T-cell epitopes**

118 SARS-CoV-2 antigens reported by Snyder et al. (26) where downloaded from  
119 <https://clients.adaptivebiotech.com/pub/covid-2020> on 17NOV2020 (MIRA release 002.1).

## 120 **Results**

### 121 **SARS-CoV-2 spike protein mutational profile from genome**

#### 122 **assemblies and NGS data**

123 First, we determined the number of non-synonymous mutations in the spike protein per sample (for  
124 geographic background of the collected samples, see S1 Fig). Of the 146,917 analyzed genome  
125 assemblies (for exclusion of samples, see Methods section) and 2,393 NGS data sets, only 13.8%  
126 (20,246 samples) contained the WT spike protein (Fig 1A). Samples of mutant viruses exhibited only  
127 few mutations in the spike protein with less than ten mutations for all but 35 sequences. However, the  
128 mean and median number of mutations increased over time from December 2019 (mean: 0.14, median:  
129 0) to September 2020 (mean: 2, median: 2; Fig 1B). Overall, we detected 2,592 distinct non-synonymous  
130 mutations in the spike protein (Supplementary Table S1).

**A**

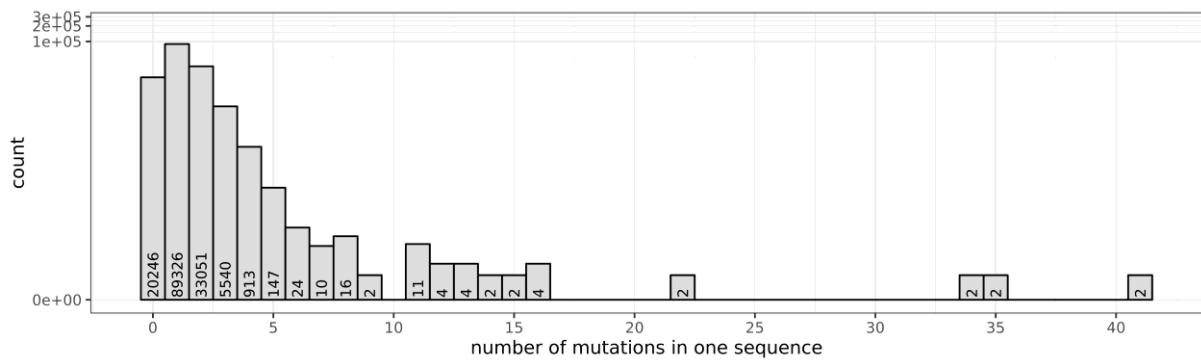

**B**

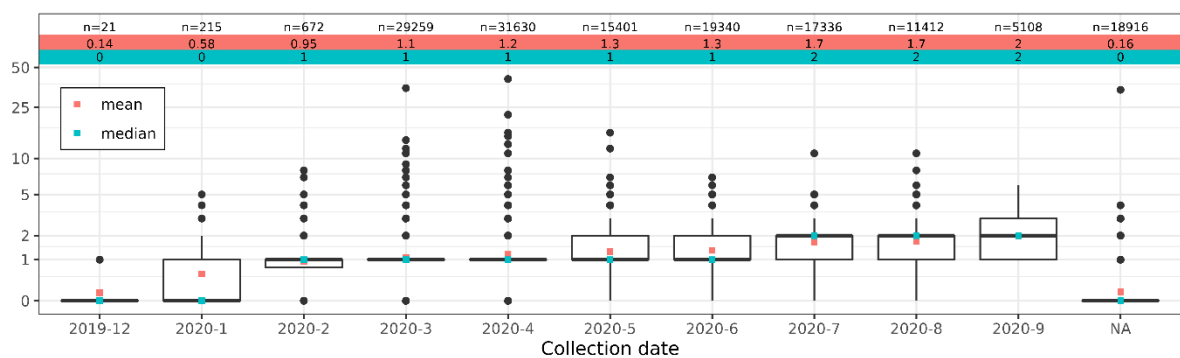

131 **Fig 1. Most of the analyzed SARS-CoV-2 sequences differ from WT spike protein, but exhibit only few non-synonymous**  
 132 **mutations.** (A) The histogram shows the number of non-synonymous mutations in the spike protein detected in the analyzed  
 133 samples. (B) The mean and median number of mutations per spike protein sequence increased over time.

## 134 Recurrent variants in SARS-CoV-2 spike protein

Most of the observed variants in the assembly and NGS data sets were recurrent (Fig 2A) and only 33.2% of the variants were singular events in the combined assembly and the NGS data. The recurrent variants were distributed throughout the whole spike protein (Fig 2B, C). Among the recurrent variants, nine and 23 mutations were found in at least 0.5% of the mutant assembly and NGS samples, respectively (labeled variants in Fig 2 B, C). The most common mutation was D614G in both the genome assemblies (124,178 samples) and the NGS data (1,792 samples) located outside the RBD (positions 319-529), followed by the RBD variants S477N in the assemblies (11,483 samples) and N440K in the NGS data (75 samples). In total, 339 distinct mutations (227 recurrent) were detected in the RBD in the assemblies out of which only two were common to more than 0.5% of the mutated assembly sequences (Fig 2A). For the NGS samples, 61 mutations in total (24 recurrent) were found in the RBD (Fig 2B)

and again only two were detected in at least 0.5% of the mutant NGS samples. Overall, 246 mutations were commonly found in the assembly and NGS data (Fig 2C).

Furthermore, 72 (2.8%) of the detected variants co-occurred frequently in at least 100 of the mutated spike protein sequences when we combined assembly and NGS data (Fig 2D). Most prominent here, was the variant D614G which was found in combination with 1,385 other variants. The combination S477N/D614G was detected in 11,470 samples. These represented the above mentioned two most frequent variants in the assembly data. The most frequent co-occurring mutations not involving D614G were L18F/A222V (1025 samples).



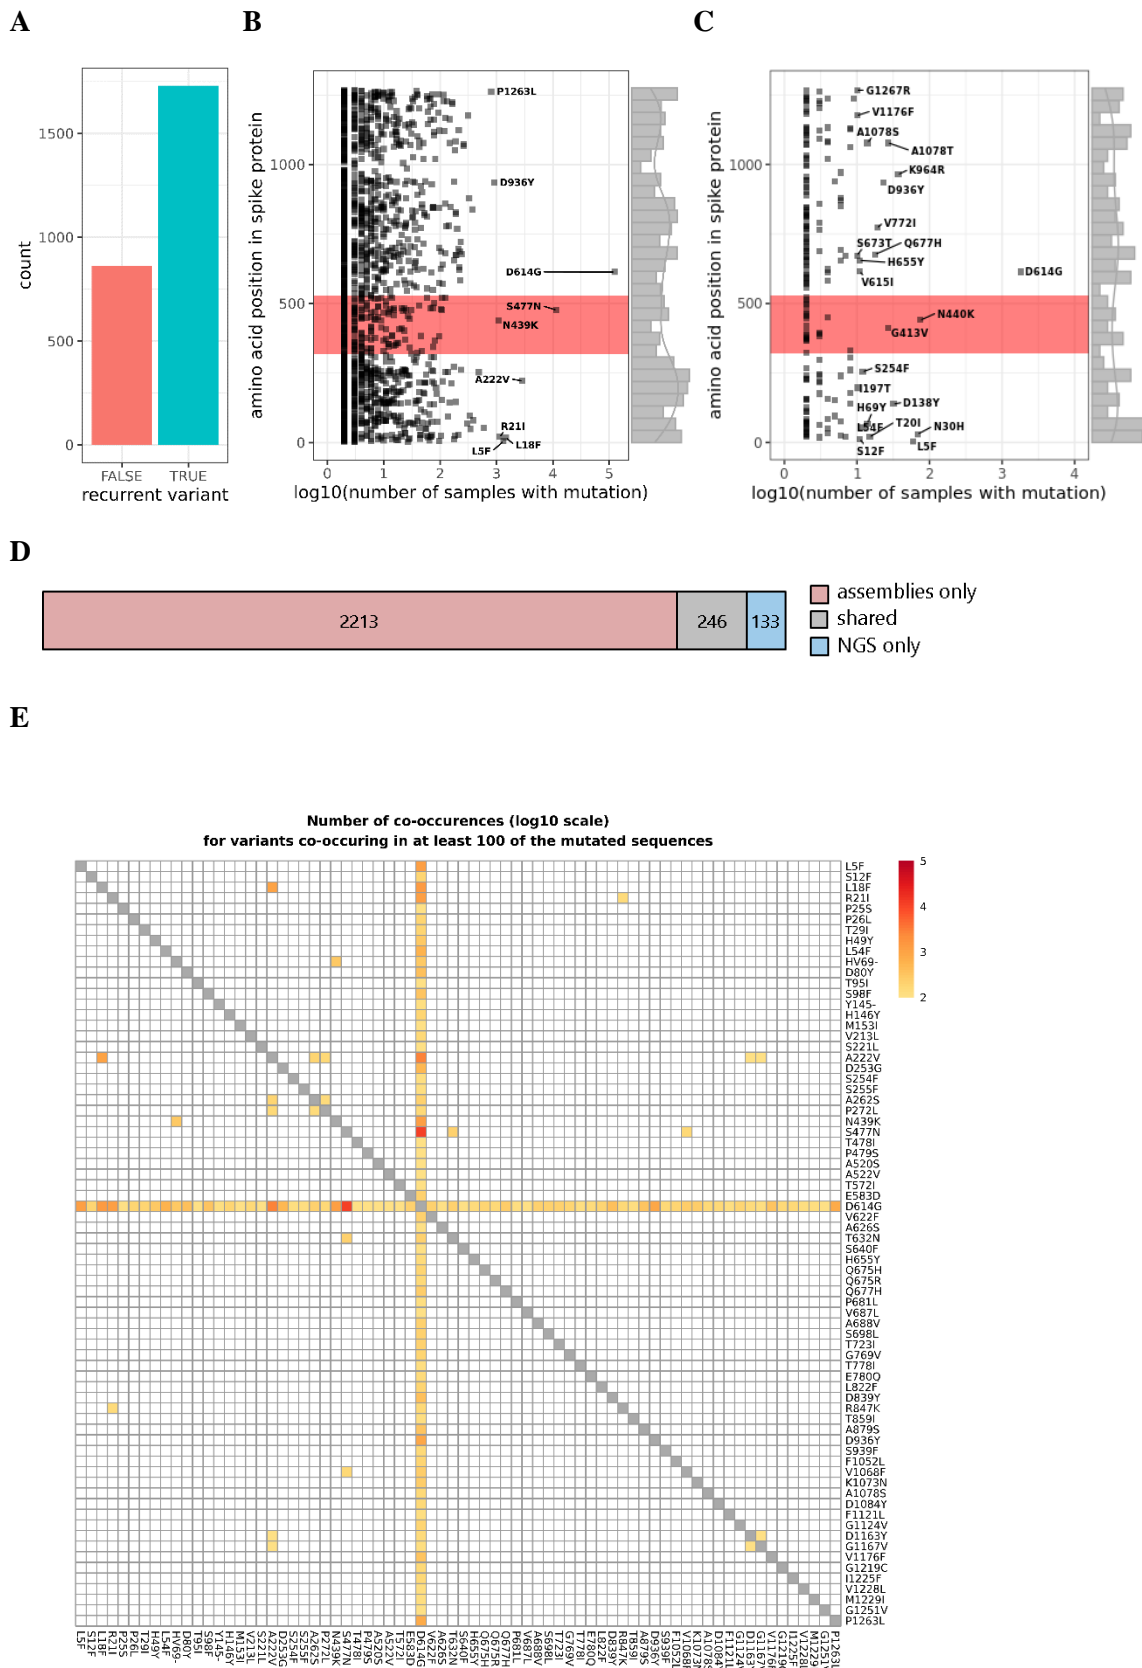

135 **Fig 2. Recurrent variants are found throughout the whole spike protein.** (A) Most of the detected variants were recurrent  
136 events occurring in at least two samples from the assembly or NGS data sets. (B, C) Each data point represents a distinct protein

137 sequence mutation in the spike protein. The labels indicate the amino acid exchange for variants found in more than 0.5% of  
138 the assemblies (B) or NGS samples (C). The RBD is highlighted in red. (D) 246 variants (grey) were detected both in the  
139 assemblies and the NGS data. (E) A subset of 72 variants co-occurred in at least 100 of the mutated spike protein sequences  
140 (assemblies and NGS data combined). For better visibility, co-occurrences in less than 100 samples were set to 0 (white tiles).

## 141 **Subclonal variants**

142 In addition, we were interested in subclonal spike protein mutations (i.e. mutations with an observed  
143 variant frequency - as derived from the NGS reads - below 100%) which might either indicate co-  
144 infection with various SARS-CoV-2 strains and/or intra-host evolution of the virus. To this end, the  
145 fraction of variant supporting reads per sample of the detected mutations was determined. Most of the  
146 variants were observed with at least 95% of the reads supporting the respective variant nucleotide (Fig  
147 3A, B). However, some mutations were only confirmed by a portion of the overlapping reads pointing  
148 to subclonal events. Filtering for a depth of at least 30 reads and a fraction of supporting reads between  
149 0.1 and 0.95 (24) resulted in 363 mutations observed in 292 samples (i.e. 15.1% of the NGS data sets  
150 with mutant spike protein) that could be classified as high-confident subclonal (Fig 3B). Most of these  
151 subclonal events were recurrent variants (Fig 3C). Especially in the earlier samples, but also in some  
152 later cases, the fractions of supporting reads within the same sample differed notably.

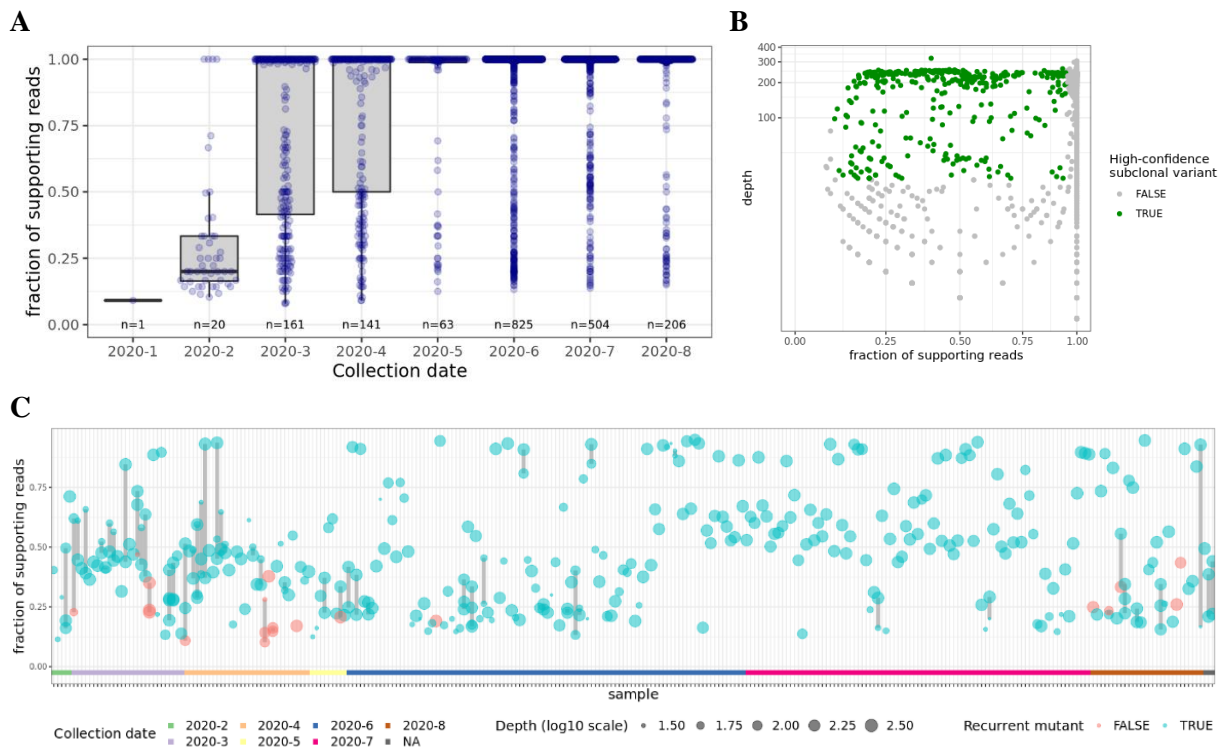

153 **Fig 3. Variant frequencies of spike protein mutants indicate presence of multiple SARS-CoV-2 mutants in some samples.**

154 (A) The boxplot shows the distributions of the fraction of supporting reads of the mutations found in the NGS data. The numbers  
 155 of underlying samples are indicated (n). Most of the observed variants have a variant allele frequency of  $\geq 0.95$  and can be  
 156 accounted as clonal. (B) Filtering for high-confidence subclonal variants (green) with sequencing depth  $\geq 30$  reads and  
 157 fractions of supporting reads between 0.1 and 0.95. (C) Sample-wise depiction of high-confidence subclonal events. Some of  
 158 the observed subclonal variants were recurrent (blue) and only few were individual (red). The samples were ordered by  
 159 collection date (see also color bar at the bottom of the plot) and point sizes indicate sequencing depth (log<sub>10</sub> scale). Subclonal  
 160 variants of the same sample are linked with grey lines. The fraction of supporting reads of variants found in the same sample  
 161 differed notably in some cases.

## 162 **Effect of detected spike protein variants on potential antibody and**

## 163 **T cell target sites**

164 Next, we investigated whether the observed spike protein variants were relevant in the context of  
 165 antibody binding or T cell recognition. In order to be visible for antibodies, a mutation has to hit a  
 166 residue on the surface of the trimeric spike protein complex. 432 (16.7%) of 2,592 unique variants  
 167 affected surface residues. For the 20 most frequent among these occurring in at least 50 samples, the  
 168 change in SASA from wild type to mutation at the mutated residue position was investigated (Fig 4A).

169 The SASA changed for all but one (H245Y) of the variants which might influence the accessibility of  
170 neutralizing antibodies. Furthermore, 2,544 (98.1%) of the 2,592 distinct variants hit at least one CD8+  
171 or CD4+ T-cell epitope (Fig 4B) when compared to the T-cell epitopes reported by Snyder *et al.* (26)  
172 no matter if they were recurrent or individual events.

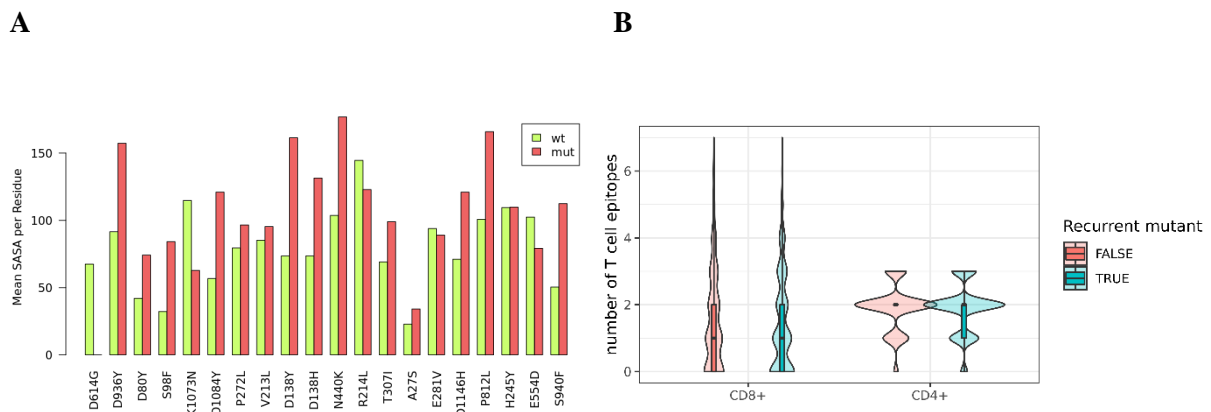

173 **Fig 4. Variants affect antibody and T cell target sites.** (A) Solvent-accessible surface area (SASA) values compared between  
174 wild type (wt) and mutation residue (mut) for surface variants occurring in at least 50 samples. The values are taken as the  
175 mean of the three replicated residues (3-meric structure of spike protein). Each time a new spike-protein structure has been  
176 generated by mutating the respective residue. The backbone of the mutated structure has not been re-modelled. The change in  
177 surface value is mainly due to change of amino acid and calculated optimal side-chain conformation. (B) The number of  
178 published T-cell epitopes (presented by MHC I or MHC II) that are affected by spike protein variants occurring in at least 50  
179 analyzed samples is depicted. Most of the variants hit at least one epitope.

## 180 Discussion

181 Our study sheds light on non-synonymous variants in the spike protein of SARS-CoV-2 in a large cohort  
182 of samples from all over the world. While most analyzed sequences vary from the reference sample  
183 from Wuhan, China, our analysis of almost 150,000 assembly and NGS samples shows an overall low  
184 mutation burden in the SARS-CoV-2 spike protein across different host populations (Fig 1). However,  
185 the mean and median number of variants per sample increased over time. Coronaviruses have fewer  
186 mutations compared to any other RNA virus due to its inherent 3' to 5' exonuclease activity (27).  
187 This suggests that the SARS-CoV-2 genome is genetically stable and the vast majority of mutations  
188 have no phenotypic effect such as virus transmissibility and virulence (28, 29). However, mutations of  
189 critical residues in the RBD of the spike protein might increase the virus transmission ability by

190 enhancing the interaction (30). Furthermore, vaccines or treatments targeting the spike protein might  
191 become less efficient, if the number of variants in the spike protein increases further.

192 We identified a subset of mutations from the assembly and NGS data that are recurrent variants in the  
193 spike protein. Van Dorp *et al.* (31) have already reported such recurrent variants in SARS-CoV-2  
194 evolution, which is a likely phenomenon of positive selection signifying the adaption of SARS-CoV-2  
195 in human hosts. Furthermore, most recurrent variants show no evidence in increase of viral transmission  
196 and are likely induced by host immunity through RNA editing mechanisms (32). However, some  
197 variants might significantly influence SARS-CoV-2 transmission and infectivity. Among such variants,  
198 the non-synonymous D614G mutation has become most prevalent among several populations. We  
199 identified around 84.4% of the samples with a D614G variant, which supports a previous theory of an  
200 increasing frequency of the D614G variant in the global pandemic (30). Studies show evidence that the  
201 D614G variant is associated with high levels of viral RNA in COVID-19 patients, suggesting a role of  
202 D614G mutations in enhancing the viral infectivity in patients (30, 33–35). In contrast to these findings,  
203 it remains unclear whether the D614G variant makes the infections more severe or may impact vaccine  
204 design (36), as the viral load does not correlate with disease severity and the variant is not in the RBD  
205 of the spike protein, which interacts with the human ACE2 protein.

206 The RBD of the spike protein is a potential target for neutralizing antibodies and the variants in these  
207 regions might influence the infectivity and pathogenicity. We have identified high frequency variants in  
208 the RBD region from the assembly data, i.e. S477N, N439K, N440K and G413V (Fig 2B, C). S477N  
209 occurs frequently almost similar to the D614G variant and studies show that S477N has potential to  
210 affect the RBD stability and strengthen the binding with the human ACE2 protein (37, 38). In our study,  
211 S477N was most frequently co-occurring with D614G (Fig 2D). This combination was estimated to  
212 spread more rapidly than the D614G mutant alone (39). Other RBD variants such as N439K and N440K  
213 also show enhanced binding affinity to the human ACE2 receptor and result in immune escape from a  
214 panel of neutralizing monoclonal antibodies (40–42). Antibody-resistant RBD variants might affect the  
215 therapeutic potential of neutralizing monoclonal antibodies by escaping through disruption of epitopes.

216 However, a significant portion of the detected variants represent individual events based on what could  
217 be deduced from the available data. This indicates the necessity to further collect SARS-CoV-2 isolates  
218 and monitor newly occurring variants. Here, the combination of assembly data (which appeared to be  
219 available in a timelier manner) and NGS samples (which also contain information on the clonality of  
220 the observed variants but which might be deposited with some delay) provide a valuable resource.

221 Further, we identified subclonal variants with a fraction of supporting reads between 0.1 and 0.95 at a  
222 sequencing depth of more than 30 reads in 15.1% of the NGS samples with mutant spike protein (Fig  
223 3). Subclonal variants are indicative of within-host viral diversity leading to transmission of multiple  
224 strains (24). Low frequency variants could have been part of parallel evolution, where the same mutation  
225 rises to detectable frequencies in different lineages and it is observed as part of SARS-CoV-2 virus  
226 adaptation (43). Further, recurrent mutations might point to co-infection with multiple strains. Sample-  
227 specific variants in turn might rather indicate that the mutation occurred after infection within the host.  
228 This viral diversity within the host might prevent complete clearance after treatment and thus might lead  
229 to the development of resistant strains. Also, subclonal variants should be considered for vaccine design  
230 as these might represent the next generation of the virus.

231 The analyzed data sets also showed that a notable portion of the individual and recurrent mutations in  
232 the spike protein (98.1%) overlap with at least one known T-cell epitope. They also may change the  
233 solvent-accessible area and thus antibody binding when they involve surface residues of the trimeric  
234 spike protein complex as shown for the 20 most frequent solvent-accessible mutations. While we had  
235 no information on the HLA-restriction of the published T-cell epitopes, the influence on CD8+ T cell  
236 epitope generation by different HLA alleles was investigated for the three common mutations L5F,  
237 D614G and G1124V (44). These mutations were predicted to result in epitope gains, losses or higher or  
238 lower HLA binding affinities. Greaney et al. (45) presented a system to map mutations in the SARS-  
239 CoV-2 RBD that escape antibody binding. However, there is no overlap with our exemplary analysis on  
240 SASA changes. In agreement with the increase of the SASA of the mutation N440K, the binding affinity  
241 of this mutant to antibody REGN10933\_REGN10987 is strengthened (46). All these findings  
242 demonstrate that SARS-CoV-2 mutants need to be set in the context of immune recognition to evaluate

243 their implications for the global spreading of the pandemic and future preventive or therapeutic  
244 approaches in a timely manner.

## 245 **Conclusion and outlook**

246 Human infections with SARS-CoV-2 are spreading globally since the beginning of 2020, necessitating  
247 preventive or therapeutic strategies and first steps towards an end to this pandemic were done with the  
248 approval of the first mRNA vaccines against SARS-CoV-2. Here, we show different types of variants  
249 (recurrent vs. individual, clonal vs. subclonal, hitting T-cell or antibody target sites vs. not-hitting) that  
250 can be incorporated in global efforts to sustainably prevent or treat infections. The underlying  
251 computational strategy might serve as a template for a platform to constantly analyze globally available  
252 sequencing data. In combination with a web-based platform to administer the results, this could help  
253 guiding global vaccine design efforts to overcome the threats of this pandemic.

254 The importance of our approach is underlined by the recently emerging UK lineage B.1.1.7 of SARS-  
255 CoV-2 (47), which is characterized by the accumulation of 17 variants; eight of those are located in the  
256 S protein. This lineage has a higher transmissibility compared to other lineages (48). The occurrence of  
257 this lineage questioned the efficacy of current vaccines, but first results showed that it at least unlikely  
258 will escape BNT162b-induced protection (49). Interestingly, the individual variants can be traced back  
259 to samples from March (P681H, T716I) and April (Y144del, N501Y, A570D) of 2020. It needs to be  
260 mentioned that the available data, although representing a large cohort, might not reflect the real  
261 distribution of the circulating variants as mostly samples of specific interest will be sequenced.  
262 International sequencing efforts, combined data analysis and prediction of variant impact will be  
263 important tools for the future in order to ensure an early detection of such genomic variants of concern.



## 264 **Conflict of Interest**

265 Author U.S. is co-founder, shareholder and CEO at BioNTech SE. The remaining authors declare that  
266 the research was conducted in the absence of any commercial or financial relationships that could be  
267 construed as a potential conflict of interest.

## 268 **Acknowledgments**

269 We thank Pablo Riesgo Ferreiro and Patrick Sorn for critical discussions. We gratefully acknowledge  
270 the authors from the originating laboratories responsible for obtaining the specimens, as well as the  
271 submitting laboratories where the sequence data were generated and shared via GISAID, NCBI Virus  
272 or the NCBI SRA, on which this research is based.

## 273 **Author contributions**

274 Conceptualization, U.S., M.L., and B.S.; Formal Analysis, B.S., R.G., T.B., and T.R.; Investigation,  
275 B.S., R.G., T.B., and M.L.; Writing – Original Draft, B.S., R.G., and T.B.; Writing – Review &  
276 Editing, B.S., R.G., U.S., and M.L.

## 277 **References**

- 278 1. Zhu N, Zhang D, Wang W, Li X, Yang B, Song J et al. A Novel Coronavirus from Patients with  
279 Pneumonia in China, 2019. *N Engl J Med* 2020; 382(8):727–33.
- 280 2. Wu F, Zhao S, Yu B, Chen Y-M, Wang W, Song Z-G et al. A new coronavirus associated with  
281 human respiratory disease in China. *Nature* 2020; 579(7798):265–9.
- 282 3. World Health Organization. WHO Coronavirus Disease (COVID-19) Dashboard: Data last updated:  
283 2021/1/19, 6:44pm CET; 2021. Available from: URL: <https://covid19.who.int/>.
- 284 4. Mahase E. Covid-19: FDA authorises neutralising antibody bamlanivimab for non-admitted  
285 patients. *BMJ* 2020; 371:m4362.
- 286 5. Tai W, He L, Zhang X, Pu J, Voronin D, Jiang S et al. Characterization of the receptor-binding  
287 domain (RBD) of 2019 novel coronavirus: Implication for development of RBD protein as a viral  
288 attachment inhibitor and vaccine. *Cell Mol Immunol* 2020; 17(6):613–20.
- 289 6. Shang W, Yang Y, Rao Y, Rao X. The outbreak of SARS-CoV-2 pneumonia calls for viral  
290 vaccines. *NPJ Vaccines* 2020; 5:18.
- 291 7. Li F. Structure, Function, and Evolution of Coronavirus Spike Proteins. *Annu Rev Virol* 2016;  
292 3(1):237–61.



- 293 8. Zhou P, Yang X-L, Wang X-G, Hu B, Zhang L, Zhang W et al. A pneumonia outbreak associated  
294 with a new coronavirus of probable bat origin. *Nature* 2020; 579(7798):270–3.
- 295 9. Lan J, Ge J, Yu J, Shan S, Zhou H, Fan S et al. Structure of the SARS-CoV-2 spike receptor-  
296 binding domain bound to the ACE2 receptor. *Nature* 2020; 581(7807):215–20.
- 297 10. Wan Y, Shang J, Graham R, Baric RS, Li F. Receptor Recognition by the Novel Coronavirus from  
298 Wuhan: An Analysis Based on Decade-Long Structural Studies of SARS Coronavirus. *J Virol* 2020;  
299 94(7).
- 300 11. Tang X, Wu C, Li X, Song Y, Yao X, Wu X et al. On the origin and continuing evolution of  
301 SARS-CoV-2. *National Science Review* 2020; 7(6):1012–23.
- 302 12. Ou J, Zhou Z, Zhang J, Lan W, Zhao S, Wu J et al. RBD mutations from circulating SARS-CoV-2  
303 strains enhance the structural stability and human ACE2 affinity of the spike protein. *bioRxiv* 2020.
- 304 13. Morais IJ, Polveiro RC, Souza GM, Bortolin DI, Sasaki FT, Lima ATM. The global population of  
305 SARS-CoV-2 is composed of six major subtypes. *Sci Rep* 2020; 10(1):18289.
- 306 14. Kuipers J, Batavia AA, Jablonski KP, Bayer F, Borgsmüller N, Dondi A et al. Within-patient  
307 genetic diversity of SARS-CoV-2. *bioRxiv* 2020.
- 308 15. Sun C, Chen L, Yang J, Luo C, Zhang Y, Li J et al. SARS-CoV-2 and SARS-CoV spike-RBD  
309 structure and receptor binding comparison and potential implications on neutralizing antibody and  
310 vaccine development. *bioRxiv* 2020.
- 311 16. Braun J, Loyal L, Frensch M, Wendisch D, Georg P, Kurth F et al. Presence of SARS-CoV-2  
312 reactive T cells in COVID-19 patients and healthy donors; 2020.
- 313 17. Hatcher EL, Zhdanov SA, Bao Y, Blinkova O, Nawrocki EP, Ostapchuck Y et al. Virus Variation  
314 Resource - improved response to emergent viral outbreaks. *Nucleic Acids Res* 2017; 45(D1):D482-  
315 D490.
- 316 18. Elbe S, Buckland-Merrett G. Data, disease and diplomacy: GISAID's innovative contribution to  
317 global health. *Glob Chall* 2017; 1(1):33–46.
- 318 19. Leinonen R, Sugawara H, Shumway M. The sequence read archive. *Nucleic Acids Res* 2011;  
319 39(Database issue):D19-21.
- 320 20. Brister JR, Ako-Adjei D, Bao Y, Blinkova O. NCBI viral genomes resource. *Nucleic Acids Res*  
321 2015; 43(Database issue):D571-7.
- 322 21. Li H. Aligning sequence reads, clone sequences and assembly contigs with BWA-MEM; 2013.  
323 Available from: URL: <http://arxiv.org/pdf/1303.3997v2>.
- 324 22. Li H, Handsaker B, Wysoker A, Fennell T, Ruan J, Homer N et al. The Sequence Alignment/Map  
325 format and SAMtools. *Bioinformatics* 2009; 25(16):2078–9.
- 326 23. Cingolani P, Platts A, Le Wang L, Coon M, Nguyen T, Wang L et al. A program for annotating  
327 and predicting the effects of single nucleotide polymorphisms, SnpEff: SNPs in the genome of  
328 *Drosophila melanogaster* strain w1118; iso-2; iso-3. *Fly (Austin)* 2012; 6(2):80–92.
- 329 24. Sashittal P, Luo Y, Peng J, El-Kebir M. Characterization of SARS-CoV-2 viral diversity within  
330 and across hosts. *bioRxiv* 2020. Available from: URL: <https://doi.org/10.1101/2020.05.07.083410>.
- 331 25. Guex N, Peitsch MC. SWISS-MODEL and the Swiss-PdbViewer: An environment for  
332 comparative protein modeling. *Electrophoresis* 1997; 18(15):2714–23.
- 333 26. Snyder TM, Gittelman RM, Klinger M, May DH, Osborne EJ, Taniguchi R et al. Magnitude and  
334 Dynamics of the T-Cell Response to SARS-CoV-2 Infection at Both Individual and Population Levels.  
335 *medRxiv* 2020.

- 336 27. Minskaia E, Hertzog T, Gorbalenya AE, Campanacci V, Cambillau C, Canard B et al. Discovery of  
337 an RNA virus 3'-5' exoribonuclease that is critically involved in coronavirus RNA synthesis. *Proc Natl*  
338 *Acad Sci U S A* 2006; 103(13):5108–13.
- 339 28. Grubaugh ND, Petrone ME, Holmes EC. We shouldn't worry when a virus mutates during disease  
340 outbreaks. *Nat Microbiol* 2020; 5(4):529–30.
- 341 29. Ruffell D. Coronavirus SARS-CoV-2: Filtering fact from fiction in the infodemic: Q&A with  
342 virologist Professor Urs Greber. *FEBS Lett* 2020; 594(7):1127–31.
- 343 30. Korber B, Fischer WM, Gnanakaran S, Yoon H, Theiler J, Abfalterer W et al. Tracking Changes in  
344 SARS-CoV-2 Spike: Evidence that D614G Increases Infectivity of the COVID-19 Virus. *Cell* 2020.
- 345 31. van Dorp L, Acman M, Richard D, Shaw LP, Ford CE, Ormond L et al. Emergence of genomic  
346 diversity and recurrent mutations in SARS-CoV-2. *Infect Genet Evol* 2020; 83:104351.
- 347 32. van Dorp L, Richard D, Tan CCS, Shaw LP, Acman M, Balloux F. No evidence for increased  
348 transmissibility from recurrent mutations in SARS-CoV-2. *Nat Commun* 2020; 11(1):5986.
- 349 33. Hu J, He CL, Gao Q, Zhang GJ, Cao XX, Long QX et al. The D614G mutation of SARS-CoV-2  
350 spike protein enhances viral infectivity. *bioRxiv* 2020. Available from: URL:  
351 <https://doi.org/10.1101/2020.06.20.161323>.
- 352 34. Plante JA, Liu Y, Liu J, Xia H, Johnson BA, Lokugamage KG et al. Spike mutation D614G alters  
353 SARS-CoV-2 fitness. *Nature* 2020.
- 354 35. Ozono S, Zhang Y, Ode H, Sano K, Tan TS, Imai K et al. SARS-CoV-2 D614G spike mutation  
355 increases entry efficiency with enhanced ACE2-binding affinity. *Nat Commun* 2021; 12(1):848.
- 356 36. Grubaugh ND, Hanage WP, Rasmussen AL. Making Sense of Mutation: What D614G Means for  
357 the COVID-19 Pandemic Remains Unclear. *Cell* 2020.
- 358 37. Starr TN, Greaney AJ, Hilton SK, Ellis D, Crawford KHD, Dingens AS et al. Deep Mutational  
359 Scanning of SARS-CoV-2 Receptor Binding Domain Reveals Constraints on Folding and ACE2  
360 Binding. *Cell* 2020; 182(5):1295-1310.e20.
- 361 38. Singh A, Steinkellner G, Köchl K, Gruber K, Gruber CC. Serine 477 plays a crucial role in the  
362 interaction of the SARS-CoV-2 spike protein with the human receptor ACE2; 2020.
- 363 39. He S, Wong SWK. Statistical challenges in the analysis of sequence and structure data for the  
364 COVID-19 spike protein. Available from: URL: <http://arxiv.org/pdf/2101.02304v1>.
- 365 40. Zhou W, Xu C, Wang P, Luo M, Xu Z, Cheng R et al. N439K variant in spike protein may alter  
366 the infection efficiency and antigenicity of SARS-CoV-2 based on molecular dynamics simulation:  
367 *bioRxiv*; 2020.
- 368 41. Thomson E, Rosen L, Shepherd J, Spreafico R, da Silva Filipe A, Wojcechowskyj J et al. The  
369 circulating SARS-CoV-2 spike variant N439K maintains fitness while evading antibody-mediated  
370 immunity: *bioRxiv*; 2020.
- 371 42. Weisblum Y, Schmidt F, Zhang F, DaSilva J, Poston D, Lorenzi JC et al. Escape from neutralizing  
372 antibodies by SARS-CoV-2 spike protein variants. *Elife* 2020; 9.
- 373 43. Wright ES, Lakdawala SS, Cooper VS. SARS-CoV-2 genome evolution exposes early human  
374 adaptations. *bioRxiv* 2020. Available from: URL: <https://doi.org/10.1101/2020.05.26.117069>.
- 375 44. Guo E, Guo H. CD8 T cell epitope generation toward the continually mutating SARS-CoV-2 spike  
376 protein in genetically diverse human population: Implications for disease control and prevention.  
377 *PLoS One* 2020; 15(12):e0239566.

- 378 45. Greaney AJ, Starr TN, Gilchuk P, Zost SJ, Binshtein E, Loes AN et al. Complete Mapping of  
379 Mutations to the SARS-CoV-2 Spike Receptor-Binding Domain that Escape Antibody Recognition.  
380 *Cell Host Microbe* 2021; 29(1):44-57.e9.
- 381 46. Chen J, Gao K, Wang R, Wei G. Prediction and mitigation of mutation threats to COVID-19  
382 vaccines and antibody therapies. Available from: URL: <http://arxiv.org/pdf/2010.06357v1>.
- 383 47. Rambaut A, Loman N, Pybus O, Barclay W, Barrett J, Carabelli A et al. Preliminary genomic  
384 characterisation of an emergent SARS-CoV-2 lineage in the UK defined by a novel set of spike  
385 mutations: COVID-19 Genomics Consortium UK (CoG-UK); 2020 [cited 2021 Jan 20]. Available  
386 from: URL: [https://virological.org/t/preliminary-genomic-characterisation-of-an-emergent-sars-cov-2-  
387 lineage-in-the-uk-defined-by-a-novel-set-of-spike-mutations/563](https://virological.org/t/preliminary-genomic-characterisation-of-an-emergent-sars-cov-2-lineage-in-the-uk-defined-by-a-novel-set-of-spike-mutations/563).
- 388 48. Volz E, Mishra S, Chand M, Barrett JC, Johnson R, Geidelberg L et al. Transmission of SARS-  
389 CoV-2 Lineage B.1.1.7 in England: Insights from linking epidemiological and genetic data. medRxiv  
390 2021. Available from: URL:  
391 <https://www.medrxiv.org/content/early/2021/01/04/2020.12.30.20249034.1>.
- 392 49. Muik A, Wallisch A-K, Sanger B, Swanson KA, Muhl J, Chen W et al. Neutralization of SARS-  
393 CoV-2 lineage B.1.1.7 pseudovirus by BNT162b2 vaccine-elicited human sera; 2021.

## 394 Supporting information

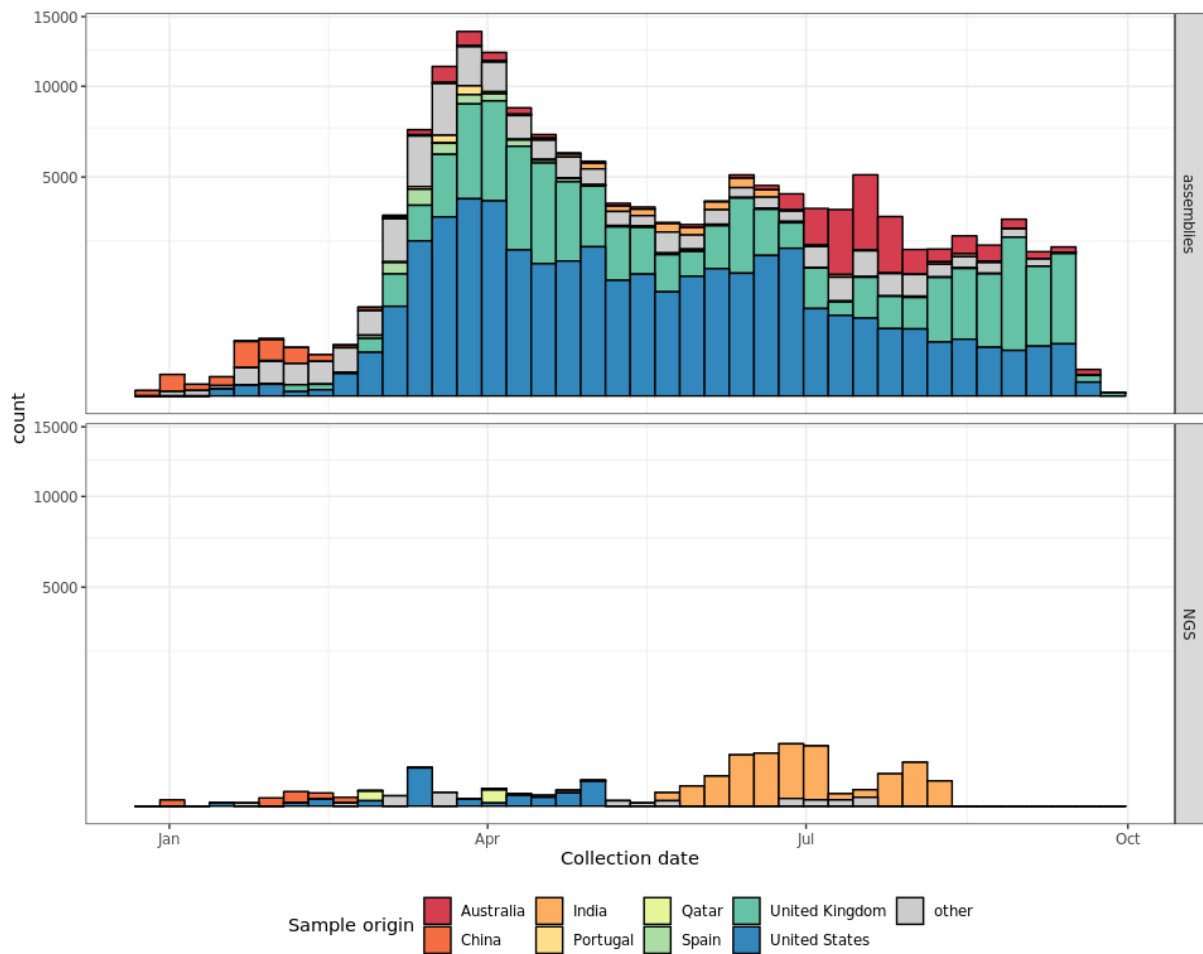

395 **S1 Fig. Number and origin of publicly available SARS-CoV-2 sequence data over time.** The  
 396 histogram shows the number of SARS-CoV-2 assembly sequences deposited at GISAID and NCBI  
 397 Virus and NGS data deposited at SRA as of 02OCT2020. Color coding indicates the sample origin.  
 398 Countries summarized as “other” include: Algeria, Andorra, Argentina, Aruba, Austria, Bahrain,  
 399 Bangladesh, Belgium, Belize, Benin, Bosnia and Herzegovina, Botswana, Brazil, Brunei, Bulgaria,  
 400 Cambodia, Canada, Chile, Colombia, Congo [DRC], Costa Rica, Crimea, Croatia, Cuba, Curacao,  
 401 Cyprus, Czech Republic, Denmark, Dominican Republic, Ecuador, Egypt, Faroe Islands, Finland,  
 402 France, Gabon, Gambia, Georgia, Germany, Ghana, Gibraltar, Greece, Guam, Guatemala, Hong Kong,  
 403 Hungary, Iceland, Indonesia, Iran, Iraq, Ireland, Israel, Italy, Jamaica, Japan, Jordan, Kazakhstan,  
 404 Kenya, Kuwait, Latvia, Lebanon, Lithuania, Luxembourg, Madagascar, Malaysia, Mali, Mexico,  
 405 Moldova, Mongolia, Montenegro, Morocco, Myanmar, Nepal, Netherlands, New Zealand, Nigeria,  
 406 North Macedonia, Norway, Oman, Pakistan, Panama, Peru, Philippines, Poland, Puerto Rico, Reunion,  
 407 Romania, Romania, Russia, Saudi Arabia, Senegal, Serbia, Sierra Leone, Singapore, Slovakia, Slovenia,  
 408 South Africa, South Korea, Sri Lanka, Suriname, Sweden, Switzerland, Taiwan, Thailand, Timor-Leste,  
 409 Tunisia, Turkey, Uganda, Ukraine, United Arab Emirates, Uruguay, Venezuela, Vietnam, Zambia and  
 410 unknown.

411

412 **S1 Table. Overview of the 2,592 distinct non-synonymous mutations in the spike protein of SARS-**  
 413 **CoV-2 detected in genome assemblies and NGS data sets.**
